# Supplementary material for: DAPPER: a data-mining resource for protein-protein interactions
Source: PubMed Central journal article supplement (PMC4581157; doi:10.1186/s13040-015-0063-3), 2015-09-24
Supplement: 13040_2015_63_MOESM1_ESM.pdf [file 13040_2015_63_MOESM1_ESM.pdf]

SF 1

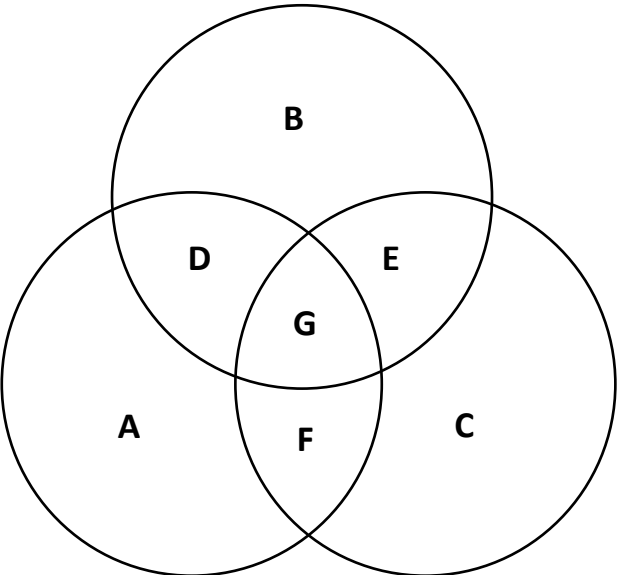

**INTERSECTION = {G}**  
**INTERSECTION PRIME = {A, B, C, D, E, F}**  
**DISTINCT = {A, B, C}**

SF 2A

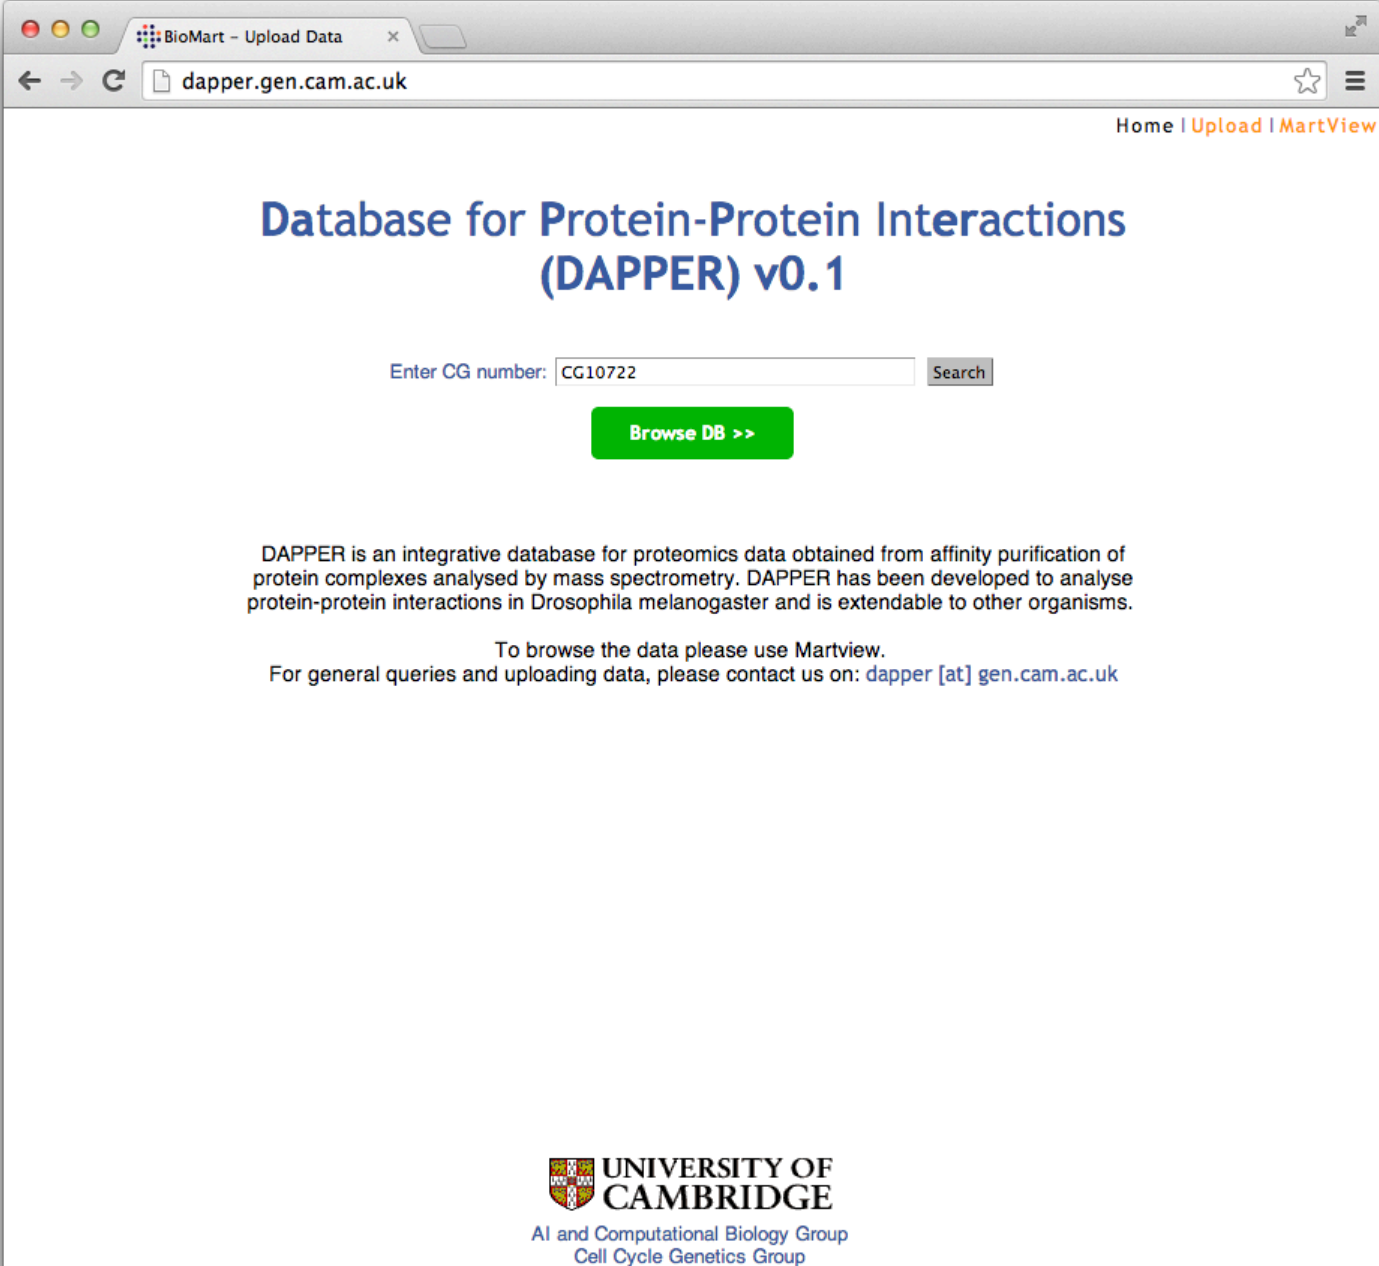

The screenshot shows a web browser window with the address bar containing 'dapper.gen.cam.ac.uk'. The page title is 'BioMart - Upload Data'. The main heading is 'Database for Protein-Protein Interactions (DAPPER) v0.1'. Below the heading is a search form with the text 'Enter CG number:' followed by an input field containing 'CG10722' and a 'Search' button. A green button labeled 'Browse DB >>' is positioned below the search form. The page contains a paragraph describing DAPPER as an integrative database for proteomics data from affinity purification of protein complexes. It also includes contact information for general queries and data uploads, directing users to use Martview and contact 'dapper [at] gen.cam.ac.uk'. At the bottom, the University of Cambridge logo is displayed, along with the text 'AI and Computational Biology Group' and 'Cell Cycle Genetics Group'.

Home | [Upload](#) | [MartView](#)

## Database for Protein-Protein Interactions (DAPPER) v0.1

Enter CG number:

[Browse DB >>](#)

DAPPER is an integrative database for proteomics data obtained from affinity purification of protein complexes analysed by mass spectrometry. DAPPER has been developed to analyse protein-protein interactions in *Drosophila melanogaster* and is extendable to other organisms.

To browse the data please use Martview.  
For general queries and uploading data, please contact us on: [dapper \[at\] gen.cam.ac.uk](mailto:dapper@gen.cam.ac.uk)

 UNIVERSITY OF CAMBRIDGE  
AI and Computational Biology Group  
Cell Cycle Genetics Group

SF 2B

BioMart - MartView

dapper.gen.cam.ac.uk/biomart/martview/fc963089f185970a16adc2eff435dc1c

Home | Upload | MartView

# DAPPER

New Count Results URL XML Perl Help

Export all results to

Unique results only

Email notification to

View  rows as   Unique results only

| Experiment id | Protein accession       | Peptide count | Protein score | Protein mass | Flybase Gene ID             | Flybase Gene Name       | Bait name      |
|---------------|-------------------------|---------------|---------------|--------------|-----------------------------|-------------------------|----------------|
| 12            | <a href="#">CG10722</a> | 590           | 18965         | 68655        | <a href="#">FBgn0032848</a> | <a href="#">nesd</a>    | Nesd           |
| 2             | <a href="#">CG10722</a> | 6             | 497           | 68655        | <a href="#">FBgn0032848</a> | <a href="#">nesd</a>    | Cdc27          |
| 57            | <a href="#">CG10722</a> | 5             | 135           | 68655        | <a href="#">FBgn0032848</a> | <a href="#">nesd</a>    | NONE           |
| 226           | <a href="#">CG10722</a> | 1             | 106           | 68655        | <a href="#">FBgn0032848</a> | <a href="#">CG10722</a> | Rad23          |
| 28            | <a href="#">CG10722</a> | 1             | 86            | 68655        | <a href="#">FBgn0032848</a> | <a href="#">nesd</a>    | Nuf2           |
| 30            | <a href="#">CG10722</a> | 1             | 61            | 68655        | <a href="#">FBgn0032848</a> | <a href="#">nesd</a>    | Spc24/HDC12388 |

**Dataset**  
Mass Spec  
**Filters**  
Limit to protein accession/s [e.g. CG1524] : [ID-list specified]  
**Attributes**  
Experiment id  
Protein accession  
Peptide count  
Protein score  
Protein mass  
Flybase Gene ID  
Flybase Gene Name  
Bait name

**Dataset**  
[None Selected]

biomart version 0.7

SF 3A

The screenshot shows a web browser window with the address bar containing the URL `dapper.gen.cam.ac.uk/biomart/martview/fc963089f185970a16adc2eff435dc1c`. The page title is "BioMart - MartView". In the top right corner, there are links for "Home", "Upload", and "MartView". The main heading is "DAPPER".

Below the heading is a navigation bar with buttons for "New", "Count", and "Results". On the right side of this bar are icons for "URL", "XML", "Perl", and "Help".

The interface is divided into two main sections. The left section is a sidebar with the following elements:

- Dataset** (highlighted)
- Mass Spec
- Filters**
- [None selected]
- Attributes**
- Experiment id
- Protein accession
- Peptide count
- Protein score
- Protein mass
- Flybase Gene ID
- Flybase Gene Name
- Bait name

The right section contains two dropdown menus:

- The first dropdown is set to "PROTEOMICS (CAMBRIDGE - UK)".
- The second dropdown is set to "Mass Spec".

At the bottom of the page, there is a footer that reads "biomart version 0.7".

SF 3B

The screenshot shows a web browser window with the URL `dapper.gen.cam.ac.uk/biomart/martview/4b01f72a381f04c3958293dcf73c2bf3`. The page title is "DAPPER" and the navigation bar includes "Home | Upload | MartView". Below the navigation bar are buttons for "New", "Count", and "Results", and utility buttons for "URL", "XML", "Perl", and "Help".

The main content area is titled "Please restrict your query using criteria below". It features a sidebar on the left with sections for "Dataset" (Mass Spec), "Filters" (Limit to Experiment id/s : [ID-list specified]), and "Attributes" (Experiment id, Protein accession, Peptide count, Protein score, Protein mass, Flybase Gene ID, Flybase Gene Name, Bait name). The "Dataset" section is currently set to "[None Selected]".

The main query area is titled "Please restrict your query using criteria below" and contains several filter options:

- Protein Features
  - Limit to Experiment id/s: A text input field containing "12" is highlighted with a red box. Below it are "Choose File" and "No file chosen" buttons.
  - Limit to protein accession/s [e.g CG1524]: A text input field with "Choose File" and "No file chosen" buttons below it.
  - Limit to protein accession/s (secondary) [e.g CG1524-PA]: A text input field with "Choose File" and "No file chosen" buttons below it.
- Peptide count: A text input field.
- Hit number: A text input field.
- Protein score: A text input field.
- Protein mass: A text input field.
- Protein matches: A text input field.
- Protein coverage: A text input field.

The footer of the page displays "biomart version 0.7".

BioMart - MartView

dapper.gen.cam.ac.uk/biomart/martview/fc963089f185970a16adc2eff435dc1c

Home | Upload | MartView

# DAPPER

New Count Results URL XML Perl Help

Dataset: Mass Spec

Filters: Limit to Experiment id/s : [ID-list specified]

Attributes: Experiment id, Protein accession, Peptide count, Protein score, Protein mass, Flybase Gene ID, Flybase Gene Name, Bait name

Dataset: [None Selected]

Export all results to: File TSV Unique results only  Go

Email notification to:

View: 10 rows as HTML Unique results only

| Experiment id | Protein accession       | Peptide count | Protein score | Protein mass | Flybase Gene ID             | Flybase Gene Name             | Bait name |
|---------------|-------------------------|---------------|---------------|--------------|-----------------------------|-------------------------------|-----------|
| 12            | <a href="#">CG10722</a> | 590           | 18965         | 68655        | <a href="#">FBgn0032848</a> | <a href="#">nesd</a>          | Nesd      |
| 12            | <a href="#">CG1258</a>  | 180           | 6174          | 101118       | <a href="#">FBgn0011692</a> | <a href="#">pav</a>           | Nesd      |
| 12            | <a href="#">CG13345</a> | 156           | 4014          | 70574        | <a href="#">FBgn0086356</a> | <a href="#">tum</a>           | Nesd      |
| 12            | <a href="#">CG31196</a> | 23            | 689           | 29951        | <a href="#">FBgn0020238</a> | <a href="#">14-3-3epsilon</a> | Nesd      |
| 12            | <a href="#">CG17870</a> | 19            | 642           | 28324        | <a href="#">FBgn0004907</a> | <a href="#">14-3-3zeta</a>    | Nesd      |
| 12            | <a href="#">CG17870</a> | 18            | 542           | 28379        | <a href="#">FBgn0004907</a> | <a href="#">14-3-3zeta</a>    | Nesd      |
| 12            | <a href="#">CG3195</a>  | 6             | 384           | 17891        | <a href="#">FBgn0034968</a> | <a href="#">Rpl12</a>         | Nesd      |
| 12            | <a href="#">CG4264</a>  | 9             | 299           | 71372        | <a href="#">FBgn0001219</a> | <a href="#">Hsc70-4</a>       | Nesd      |
| 12            | <a href="#">CG14637</a> | 7             | 273           | 70014        | <a href="#">FBgn0015331</a> | <a href="#">abs</a>           | Nesd      |
| 12            | <a href="#">CG4147</a>  | 6             | 270           | 72330        | <a href="#">FBgn0001218</a> | <a href="#">Hsc70-3</a>       | Nesd      |

biomart version 0.7

# DAPPER

**Dataset**  
 Mass Spec  
**Filters**  
 Limit to Experiment id/s : [ID-list specified]  
**Attributes**  
 Experiment id  
 Protein accession  
 Peptide count  
 Protein score  
 Protein mass  
 Flybase Gene ID  
 Flybase Gene Name  
 Bait name

Export all results to     
 Unique results only    
 Email notification to

View  rows as   Unique results only

| Experiment id | Protein accession       | Peptide count | Protein score | Protein mass | Flybase Gene ID             | Flybase Gene Name             | Bait name |
|---------------|-------------------------|---------------|---------------|--------------|-----------------------------|-------------------------------|-----------|
| 12            | <a href="#">CG10722</a> | 100           | 18965         | 68655        | <a href="#">FBgn0032848</a> | <a href="#">nesd</a>          | Nesd      |
| 12            | <a href="#">CG1258</a>  | 200           | 6174          | 101118       | <a href="#">FBgn0011692</a> | <a href="#">pav</a>           | Nesd      |
| 12            | <a href="#">CG13345</a> | All           | 4014          | 70574        | <a href="#">FBgn0086356</a> | <a href="#">tum</a>           | Nesd      |
| 12            | <a href="#">CG31196</a> | 23            | 689           | 29951        | <a href="#">FBgn0020238</a> | <a href="#">14-3-3epsilon</a> | Nesd      |
| 12            | <a href="#">CG17870</a> | 19            | 642           | 28324        | <a href="#">FBgn0004907</a> | <a href="#">14-3-3zeta</a>    | Nesd      |
| 12            | <a href="#">CG17870</a> | 18            | 542           | 28379        | <a href="#">FBgn0004907</a> | <a href="#">14-3-3zeta</a>    | Nesd      |
| 12            | <a href="#">CG3195</a>  | 6             | 384           | 17891        | <a href="#">FBgn0034968</a> | <a href="#">Rpl12</a>         | Nesd      |
| 12            | <a href="#">CG4264</a>  | 9             | 299           | 71372        | <a href="#">FBgn0001219</a> | <a href="#">Hsc70-4</a>       | Nesd      |
| 12            | <a href="#">CG14637</a> | 7             | 273           | 70014        | <a href="#">FBgn0015331</a> | <a href="#">abs</a>           | Nesd      |
| 12            | <a href="#">CG4147</a>  | 6             | 270           | 72330        | <a href="#">FBgn0001218</a> | <a href="#">Hsc70-3</a>       | Nesd      |

**Dataset**  
 [None Selected]

SF 3E

BioMart - MartView

dapper.gen.cam.ac.uk/biomart/martview/fc963089f185970a16adc2eff435dc1c

Home | Upload | MartView

# DAPPER

New Count Results URL XML Perl Help

**Dataset**  
Mass Spec

**Filters**  
Limit to Experiment id/s : [ID-list specified]

**Attributes**  
Experiment id  
Protein accession  
Peptide count  
Protein score  
Protein mass  
Flybase Gene ID  
Flybase Gene Name  
Bait name

**Dataset**  
[None Selected]

- CHOOSE ADDITIONAL DATASET -

biomart version 0.7



SF 3F

The screenshot shows a web browser window with the URL `dapper.gen.cam.ac.uk/biomart/martview/fc963089f185970a16adc2eff435dc1c`. The page title is "BioMart - MartView". The main heading is "DAPPER". A navigation bar contains buttons for "New", "Count", "Results", "URL", "XML", "Perl", and "Help".

The interface is divided into two main sections. The left section is a sidebar with the following content:

- Dataset**
- Mass Spec
- Filters**
- Limit to Experiment id/s : [ID-list specified]
- Attributes**
- Experiment id
- Protein accession
- Peptide count
- Protein score
- Protein mass
- Flybase Gene ID
- Flybase Gene Name
- Bait name

The right section contains a dropdown menu for dataset selection, which is currently set to "[ENSEMBL GENES 75 (SANGER - UK)] Drosophila melanogaster genes (BDGP5)". Below this, there is a section for the selected dataset:

- Dataset**
- Drosophila melanogaster genes (BDGP5)
- Filters**
- [None selected]
- Attributes**
- GO Term Name
- GOSlim GOA Description
- FlyBaseName gene
- Interpro Description

At the bottom of the page, the text "biomart version 0.7" is displayed.

BioMart - MartView

dapper.gen.cam.ac.uk/biomart/martview/fc963089f185970a16adc2eff435dc1c

Home | Upload | MartView

# DAPPER

New Count Results URL XML Perl Help

Export all results to  TSV  Unique results only

Email notification to

View 20 rows as HTML  Unique results only

| Experiment id | Protein accession       | Peptide count | Protein score | Protein mass | Flybase Gene ID             | Flybase Gene Name     | Bait name | GO Term Name                                                                                                                                                                                         |
|---------------|-------------------------|---------------|---------------|--------------|-----------------------------|-----------------------|-----------|------------------------------------------------------------------------------------------------------------------------------------------------------------------------------------------------------|
| 12            | <a href="#">CG2960</a>  | 2             | 68            | 15005        | <a href="#">FBgn0003941</a> | <a href="#">Rpl40</a> | Nesd      | ubiquitin-dependent protein catabolic process,translation,ribosome,cytoplasmic ribosomal subunit,microtubule associated complex,lipid particle,structural constituent of ribosome,protein binding    |
| 12            | <a href="#">CG4897</a>  | 2             | 69            | 29591        | <a href="#">FBgn0005593</a> | <a href="#">Rpl7</a>  | Nesd      | mitotic spindle elongation,centrosome duplication,mitotic spindle organization,translation,pupariation,ribosome,large ribosomal subunit,structural constituent of ribosome,mRNA binding,rRNA binding |
| 12            | <a href="#">CG4337</a>  | 1             | 91            | 16357        | <a href="#">FBgn0010438</a> | <a href="#">mtSSB</a> | Nesd      | DNA replication,mitochondrial genome maintenance,mitochondrion,mitochondrial chromosome,single-stranded DNA binding                                                                                  |
| 12            | <a href="#">CG17489</a> | 5             | 95            | 34244        | <a href="#">FBgn0064225</a> | <a href="#">Rpl5</a>  | Nesd      | translation,ribosomal large subunit assembly,ribosome,cytoplasmic large ribosomal subunit,intracellular,protein binding,structural constituent of ribosome,5S rRNA binding                           |

blomart version 0.7

SF 4A

The screenshot shows a web browser window with the URL `dapper.gen.cam.ac.uk/biomart/martview/d497bc2d559f18bdf0287c88891cb181`. The page title is "BioMart - MartView". The main header displays "DAPPER" and navigation links for "Home", "Upload", and "MartView". A secondary navigation bar includes buttons for "New", "Count", "Results", "URL", "XML", "Perl", and "Help".

The interface is divided into two main sections. On the left, a sidebar contains the following information:

- Dataset:** Mass Spec
- Filters:** Bait accession number : CG4274
- Attributes:** Experiment id, Protein accession, Peptide count, Protein score, Protein mass, Flybase Gene ID, Flybase Gene Name, Bait name
- Dataset:** [None Selected]

The main content area displays a list of filter options, each with a checkbox and a corresponding input field:

- Organism: Drosophila melanogaster
- Date of experiment: [Text input]
- First name: [Text input]
- Last name: [Text input]
- Source: Cells
- Promoter for cells: Constitutive
- Mass spec facility: [Text input]
- Bait name: [Text input]
- Bait accession number: CG4274 (highlighted with a red box)
- Bait full length: Yes
- Bait exp domain start: [Text input]
- Bait exp domain end: [Text input]

The footer of the page indicates "biomart version 0.7".

SF 4B

The screenshot shows a web browser window with the address bar containing the URL: `dapper.gen.cam.ac.uk/biomart/martview/d497bc2d559f18bdf0287c88891cb181`. The page title is "BioMart - MartView". The main header features the "DAPPER" logo and navigation links for "Home", "Upload", and "MartView". Below the header is a black navigation bar with buttons for "New", "Count", "Results", "URL", "XML", "Perl", and "Help".

The main content area is divided into two columns. The left column contains a sidebar with the following sections:

- Mass Spec**
  - Filters**
  - Bait accession number : CG4274
  - Attributes**
    - Experiment id
    - Protein accession
    - Peptide count
    - Protein score
    - Protein mass
    - Flybase Gene ID
    - Flybase Gene Name
    - Bait name
- Dataset**
  - Drosophila melanogaster genes (BDGP5)
  - Filters**
    - [None selected]
  - Attributes**
    - GO Term Name
    - GOSlim GOA Description
    - FlyBaseName gene
    - Interpro Description

The right column displays a search filter: "[ENSEMBL GENES 75 (SANGER - UK)] Drosophila melanogaster genes (BDGP5)". Below this filter is a large empty white area, likely intended for displaying search results.

At the bottom of the page, a footer indicates "biomart version 0.7".

BioMart - MartView

dapper.gen.cam.ac.uk/biomart/martview/d497bc2d559f18bdf0287c88891cb181

Home | Upload | MartView

# DAPPER

New Count Results URL XML Perl Help

Mass Spec

**Filters**

Bait accession number :  
CG4274

**Attributes**

Experiment id  
Protein accession  
Peptide count  
Protein score  
Protein mass  
Flybase Gene ID  
Flybase Gene Name  
Bait name

**Dataset**

Drosophila melanogaster genes (BDGP5)

**Filters**

GO Term Name [e.g. regulation of biological process] : kinetochore

**Attributes**

GO Term Name  
GOSlim GOA Description

biomart version 0.7

Please restrict your query using criteria below

REGION:

GENE:

TRANSCRIPT EVENT:

GENE ONTOLOGY:

GO Evidence code

IBA  
IC  
IDA  
IEA  
IEP

GO Term Accession (e.g. GO:0050789)  
[Max 500 advised]

Choose File No file chosen

GO Term Name [e.g. regulation of biological process]

kinetochore

MULTI SPECIES COMPARISONS:

PROTEIN DOMAINS AND FAMILIES:

VARIATION:

SF 4D

BioMart - MartView

dapper.gen.cam.ac.uk/biomart/martview/29589751b809911aa5fd7f631a5bc018

Home | Upload | MartView

# DAPPER

New Count Results URL XML Perl Help

Export all results to  TSV  Unique results only

Email notification to

View 20 rows as SORT\_HTML  Unique results only

| Experiment id | Protein accession       | Peptide count | Protein score | Protein mass | Flybase Gene ID             | Flybase Gene Name       | Bait name | GO Term Name                                       |
|---------------|-------------------------|---------------|---------------|--------------|-----------------------------|-------------------------|-----------|----------------------------------------------------|
| 6             | <a href="#">CG4274</a>  | 105           | 6227          | 57502        | <a href="#">FBgn0001086</a> | <a href="#">fzy</a>     | Fzy       | kinetochore                                        |
| 143           | <a href="#">CG4274</a>  | 114           | 6197          | 57502        | <a href="#">FBgn0001086</a> | <a href="#">fzy</a>     | Fzy       | kinetochore                                        |
| 139           | <a href="#">CG4274</a>  | 113           | 6170          | 57502        | <a href="#">FBgn0001086</a> | <a href="#">fzy</a>     | Fzy       | kinetochore                                        |
| 145           | <a href="#">CG4274</a>  | 120           | 5904          | 57502        | <a href="#">FBgn0001086</a> | <a href="#">fzy</a>     | Fzy       | kinetochore                                        |
| 142           | <a href="#">CG4274</a>  | 70            | 3677          | 57502        | <a href="#">FBgn0001086</a> | <a href="#">fzy</a>     | Fzy       | kinetochore                                        |
| 141           | <a href="#">CG4274</a>  | 74            | 3407          | 57502        | <a href="#">FBgn0001086</a> | <a href="#">fzy</a>     | Fzy       | kinetochore                                        |
| 140           | <a href="#">CG4274</a>  | 62            | 3040          | 57502        | <a href="#">FBgn0001086</a> | <a href="#">fzy</a>     | Fzy       | kinetochore                                        |
| 6             | <a href="#">CG7838</a>  | 60            | 2827          | 166382       | <a href="#">FBgn0263855</a> | <a href="#">BubR1</a>   | Fzy       | condensed chromosome outer kinetochore,kinetochore |
| 144           | <a href="#">CG4274</a>  | 66            | 2775          | 57502        | <a href="#">FBgn0001086</a> | <a href="#">fzy</a>     | Fzy       | kinetochore                                        |
| 7             | <a href="#">CG4274</a>  | 36            | 2123          | 57502        | <a href="#">FBgn0001086</a> | <a href="#">fzy</a>     | Fzy       | kinetochore                                        |
| 6             | <a href="#">CG7581</a>  | 21            | 1515          | 37791        | <a href="#">FBgn0025457</a> | <a href="#">Bub3</a>    | Fzy       | kinetochore                                        |
| 126           | <a href="#">CG4274</a>  | 31            | 1474          | 57502        | <a href="#">FBgn0001086</a> | <a href="#">fzy</a>     | Fzy       | kinetochore                                        |
| 60            | <a href="#">CG4274</a>  | 33            | 1371          | 57502        | <a href="#">FBgn0001086</a> | <a href="#">fzy</a>     | Fzy       | kinetochore                                        |
| 146           | <a href="#">CG4274</a>  | 22            | 1088          | 57502        | <a href="#">FBgn0001086</a> | <a href="#">fzy</a>     | Fzy       | kinetochore                                        |
| 130           | <a href="#">CG4274</a>  | 19            | 937           | 57502        | <a href="#">FBgn0001086</a> | <a href="#">fzy</a>     | Fzy       | kinetochore                                        |
| 126           | <a href="#">CG7838</a>  | 16            | 752           | 166382       | <a href="#">FBgn0263855</a> | <a href="#">BubR1</a>   | Fzy       | condensed chromosome outer kinetochore,kinetochore |
| 146           | <a href="#">CG11451</a> | 12            | 750           | 224107       | <a href="#">FBgn0037025</a> | <a href="#">Spc105B</a> | Fzy       | condensed chromosome outer kinetochore             |
| 139           | <a href="#">CG7838</a>  | 10            | 596           | 166382       | <a href="#">FBgn0263855</a> | <a href="#">BubR1</a>   | Fzy       | kinetochore,condensed chromosome                   |

Dataset  
Mass Spec  
Filters  
Bait accession number : CG4274  
Attributes  
Experiment id  
Protein accession  
Peptide count  
Protein score  
Protein mass  
Flybase Gene ID  
Flybase Gene Name  
Bait name  
Dataset 34 / 15682 Genes  
Drosophila melanogaster genes (BDGP5)  
Filters  
GO Term Name [e.g. regulation of biological process] : kinetochore  
Attributes  
GO Term Name

biomart version 0.7

SF 5A

The screenshot shows a web browser window with the address bar containing the URL `dapper.gen.cam.ac.uk/biomart/martview/d497bc2d559f18bdf0287c88891cb181`. The page title is "BioMart - MartView". The main header includes "Home | Upload | MartView" and the "DAPPER" logo. A navigation bar contains buttons for "New", "Count", "Results", "URL", "XML", "Perl", and "Help".

The left sidebar displays the "Dataset" as "Mass Spec" and lists "Filters" and "Attributes". The "Attributes" list includes: Experiment id, Protein accession, Peptide count, Protein score, Protein mass, Flybase Gene ID, Flybase Gene Name, and Bait name. The "Dataset" section shows "[None Selected]".

The main content area is titled "Please restrict your query using criteria below". It features a section for "Protein Features" with the following options:

- Limit to Experiment id/s: A text input field containing "150" and "186", highlighted with a red box. Below it is a "Choose File" button and the text "No file chosen".
- Limit to protein accession/s [e.g. CG1524]: An empty text input field. Below it is a "Choose File" button and the text "No file chosen".
- Limit to protein accession/s (secondary) [e.g. CG1524-PA]: An empty text input field. Below it is a "Choose File" button and the text "No file chosen".
- Peptide count: An empty text input field.
- Hit number: An empty text input field.
- Protein score: An empty text input field.

The footer of the page indicates "biomart version 0.7".

SF 5B

BioMart - MartView

dapper.gen.cam.ac.uk/biomart/martview/d497bc2d559f18bdf0287c88891cb181

Home | Upload | MartView

# DAPPER

New Count Results URL XML Perl Help

Export all results to File TSV Unique results only

Email notification to

View 10 rows as INTERSECTION\_HTML Unique results only

| Experiment id | Protein accession      | Peptide count | Protein score | Flybase Gene ID             | Flybase Gene Name      | Bait name |
|---------------|------------------------|---------------|---------------|-----------------------------|------------------------|-----------|
| 186           | <a href="#">CG1782</a> | 4             | 15005         | <a href="#">FBgn0003941</a> | <a href="#">Rpl40</a>  | BubR1     |
| 150           | <a href="#">CG1782</a> | 3             | 92            | <a href="#">FBgn0003941</a> | <a href="#">Rpl40</a>  | Polo      |
| 186           | <a href="#">CG2960</a> | 1             | 63            | <a href="#">FBgn0003941</a> | <a href="#">Rpl40</a>  | BubR1     |
| 150           | <a href="#">CG2960</a> | 1             | 47            | <a href="#">FBgn0003941</a> | <a href="#">Rpl40</a>  | Polo      |
| 186           | <a href="#">CG4897</a> | 2             | 109           | <a href="#">FBgn0005593</a> | <a href="#">Rpl7</a>   | BubR1     |
| 150           | <a href="#">CG4897</a> | 7             | 305           | <a href="#">FBgn0005593</a> | <a href="#">Rpl7</a>   | Polo      |
| 186           | <a href="#">CG7660</a> | 3             | 270           | <a href="#">FBgn0038538</a> | <a href="#">pxt</a>    | BubR1     |
| 150           | <a href="#">CG7660</a> | 3             | 117           | <a href="#">FBgn0261987</a> | <a href="#">Pxt</a>    | Polo      |
| 186           | <a href="#">CG1524</a> | 1             | 57            | <a href="#">FBgn0004403</a> | <a href="#">RpS14a</a> | BubR1     |
| 150           | <a href="#">CG1524</a> | 1             | 53            | <a href="#">FBgn0004403</a> | <a href="#">RpS14a</a> | Polo      |

Dataset [None Selected]

biomart version 0.7



BioMart - MartView

dapper.gen.cam.ac.uk/biomart/martview/d497bc2d559f18bdf0287c88891cb181

Home | Upload | MartView

# DAPPER

New Count Results URL XML Perl Help

Export all results to  TSV

Unique results only  **Go**

Email notification to

View  rows as   Unique results only

| Experiment id | Protein accession       | Peptide count | Protein score | Protein mass | Flybase Gene ID             | Flybase Gene Name        | Bait name |
|---------------|-------------------------|---------------|---------------|--------------|-----------------------------|--------------------------|-----------|
| 186           | <a href="#">CG1782</a>  | 4             | 158           | 131988       | <a href="#">FBgn0023143</a> | <a href="#">Uba1</a>     | BubR1     |
| 150           | <a href="#">CG1782</a>  | 3             | 92            | 131988       | <a href="#">FBgn0023143</a> | <a href="#">Uba1</a>     | Polo      |
| 186           | <a href="#">CG2960</a>  | 1             | 63            | 15005        | <a href="#">FBgn0003941</a> | <a href="#">RpL40</a>    | BubR1     |
| 150           | <a href="#">CG2960</a>  | 1             | 47            | 15005        | <a href="#">FBgn0003941</a> | <a href="#">RpL40</a>    | Polo      |
| 186           | <a href="#">CG4897</a>  | 2             | 109           | 29591        | <a href="#">FBgn0005593</a> | <a href="#">RpL7</a>     | BubR1     |
| 150           | <a href="#">CG4897</a>  | 7             | 305           | 29591        | <a href="#">FBgn0005593</a> | <a href="#">RpL7</a>     | Polo      |
| 186           | <a href="#">CG7660</a>  | 3             | 270           | 91565        | <a href="#">FBgn0038538</a> | <a href="#">pxt</a>      | BubR1     |
| 150           | <a href="#">CG7660</a>  | 3             | 117           | 91565        | <a href="#">FBgn0261987</a> | <a href="#">Pxt</a>      | Polo      |
| 186           | <a href="#">CG1524</a>  | 1             | 57            | 16312        | <a href="#">FBgn0004403</a> | <a href="#">RpS14a</a>   | BubR1     |
| 150           | <a href="#">CG1524</a>  | 1             | 53            | 16312        | <a href="#">FBgn0004403</a> | <a href="#">RpS14a</a>   | Polo      |
| 186           | <a href="#">CG17291</a> | 5             | 304           | 66067        | <a href="#">FBgn0260439</a> | <a href="#">Pp2A-29B</a> | BubR1     |
| 150           | <a href="#">CG17291</a> | 6             | 285           | 66067        | <a href="#">FBgn0260439</a> | <a href="#">Pp2A-29B</a> | Polo      |
| 186           | <a href="#">CG5920</a>  | 1             | 38            | 29110        | <a href="#">FBgn0004867</a> | <a href="#">sop</a>      | BubR1     |
| 150           | <a href="#">CG5920</a>  | 1             | 97            | 29110        | <a href="#">FBgn0004867</a> | <a href="#">RpS2</a>     | Polo      |
| 186           | <a href="#">CG4916</a>  | 6             | 227           | 52539        | <a href="#">FBgn0004419</a> | <a href="#">me31B</a>    | BubR1     |
| 150           | <a href="#">CG4916</a>  | 3             | 135           | 52539        | <a href="#">FBgn0004419</a> | <a href="#">me31B</a>    | Polo      |
| 186           | <a href="#">CG7471</a>  | 1             | 135           | 58807        | <a href="#">FBgn0015805</a> | <a href="#">Rpd3</a>     | BubR1     |
| 150           | <a href="#">CG7471</a>  | 1             | 129           | 58807        | <a href="#">FBgn0015805</a> | <a href="#">Rpd3</a>     | Polo      |
| 186           | <a href="#">CG1862</a>  | 1             | 42            | 17285        | <a href="#">FBgn0000010</a> | <a href="#">Pcl2</a>     | BubR1     |

Dataset: Mass Spec

Filters: Limit to Experiment id/s : [ID-list specified]

Attributes: Experiment id, Protein accession, Peptide count, Protein score, Protein mass, Flybase Gene ID, Flybase Gene Name, Bait name

Dataset: [None Selected]

biomart version 0.7
